# Supplementary material for: Characterization of a Stress-Enhanced Promoter from the Grass Halophyte, Spartina alterniflora L.
Source: MDPI journal article supplement (doi:10.3390/biology11121828), 2022-12-15
Supplement: s1 [file s1]

**Supplementary Table S1. Primers used for generation of deletion series promoter constructs**

| <b>Primer ID</b>               | <b>Seq with restriction sites (5'-3')</b> |
|--------------------------------|-------------------------------------------|
| <i>pAsrI</i> <sub>1875</sub> R | CATGCCATGGGGCCGGCCGGGACCGATCGGTG          |
| <i>pAsrI</i> <sub>1875</sub> F | CCCAAGCTTGGTGCGTGAAGATGGAGGTACCTTG        |
| <i>pAsrI</i> <sub>1779</sub> F | CCCAAGCTTCCAATTTGTGGTCTCGTGTTTTTCATGCTTTG |
| <i>pAsrI</i> <sub>1621</sub> F | CCCAAGCTTCATATGTGTGTTTCGCTAAAAAAGTTTTTCGG |
| <i>pAsrI</i> <sub>1453</sub> F | CCCAAGCTTGTGTTGTGTGGTTACAATAGATGGATGTAGC  |
| <i>pAsrI</i> <sub>994</sub> F  | CCCAAGCTTCGTGTGTCCCAATTGCACCGTGTAC        |
| <i>pAsrI</i> <sub>755</sub> F  | CCCAAGCTTTTGCAGACGCTGATAGGAAAAAATCG       |
| <i>pAsrI</i> <sub>491</sub> F  | CCCAAGCTTCTCATCTGCTCATGCTTCCATTCTTCG      |

**Supplementary Table S2. Overrepresentation of TF-family binding domains and their functional category**

| <b>TF Family</b>                                    | <b>Match</b> | <b>Functional category</b>                              |
|-----------------------------------------------------|--------------|---------------------------------------------------------|
| Arabidopsis homeobox protein                        | 39           | ABA responsive                                          |
| MYB proteins with single DNA binding repeat         | 21           | Water and salt stress                                   |
| Circadian control factors                           | 14           | Auxin, salt stress                                      |
| L1 box, motif for L1 layer-specific expression      | 14           | Morphogenesis                                           |
| MYB-like proteins                                   | 14           | Water and salt stress                                   |
| Plant specific NAC                                  | 12           | Negative regulation of ABA response                     |
| DNA binding with one finger (DOF)                   | 11           | Response to water stimulus                              |
| GT-box elements                                     | 11           | cellular response to water deprivation                  |
| Transcription repressor KANADI                      | 11           | Transcriptional repressor                               |
| Plant I-Box sites                                   | 8            | Light response                                          |
| MADS box proteins                                   | 8            | Flowering ABA, Cold                                     |
| NAC factors with transmembrane motif                | 8            | Cold and salt stress                                    |
| Vertebrate TATA binding protein factor              | 7            | Transcriptional core element                            |
| Dehydration responsive element binding factors      | 7            | Dehydration, cold, salt                                 |
| Heat shock factors                                  | 7            | Heat, light, hypoxia                                    |
| Nodulin consensus sequence 1                        | 7            | Nodule induction                                        |
| DNA-binding proteins with plant-specific TCP-domain | 7            | ABA and Auxin                                           |
| Myc-like basic helix-loop-helix binding factors     | 6            | Light response                                          |
| NAC domain transcription factors                    | 6            | Drought recovery, reactive oxygen species               |
| Storekeeper like transcriptional regulators         | 6            | Negative regulation, sugar response                     |
| W Box family                                        | 6            | ABA-activated signaling, salt stress, water deprivation |

|                                                                                                 |   |                                             |
|-------------------------------------------------------------------------------------------------|---|---------------------------------------------|
| Auxin response element                                                                          | 5 | Reproductive development                    |
| Calmodulin binding / CGCG box binding proteins                                                  | 5 | Cold response                               |
| GCC box family                                                                                  | 5 | salt, water stress                          |
| Golden2-like factors                                                                            | 5 | phosphate starvation                        |
| LOB domain factors                                                                              | 5 | Development                                 |
| Legumin Box family                                                                              | 5 | seed-specific                               |
| MYB IIG-type binding sites                                                                      | 5 | Water deprivation, salt stress              |
| Secondary wall NACs                                                                             | 5 | Development                                 |
| AT-hook containing transcription factors                                                        | 4 | Defense response                            |
| M-phase-specific activator elements                                                             | 4 | Negative regulation                         |
| Opaque-2 like transcriptional activators                                                        | 4 | cellular response to abscisic acid stimulus |
| Factors involved in programmed cell death response                                              | 4 | Apoptosis                                   |
| SBP-domain proteins                                                                             | 4 | Anther-specific                             |
| SHI related sequence family members                                                             | 4 | Auxin homeostasis                           |
| CRC domain containing tesmin/TSO1-like CXC (TCX) factors                                        | 4 | Ovule specific                              |
| Time-of-day-specific cis regulatory elements                                                    | 4 | Circadian rhythm                            |
| Core promoter motif ten elements                                                                | 3 | Core promoter element, TATA-independent     |
| Yeast TATA binding protein factor                                                               | 3 | Transcriptional core element                |
| AS1/AS2 repressor complex                                                                       | 3 | Salt stress, defense, Repressor             |
| Brassinosteroid (BR) response element                                                           | 3 | Brassinosteroid (BR) response               |
| CCCH domain-containing factors                                                                  | 3 | RNA processing                              |
| Calcium regulated NAC-factors                                                                   | 3 | Negative regulation                         |
| GA- and ABA-responsive zinc finger like factors                                                 | 3 | ABA, GA                                     |
| Jasmonate response element                                                                      | 3 | JA, ABA, wounding, salt stress              |
| LFY binding site                                                                                | 3 | Flowering                                   |
| Sucrose box                                                                                     | 3 | Sugar Response                              |
| Basic/leucine zipper-type transcription factors of the TGA-family - TGACG motif-binding factors | 3 | development                                 |
| Zinc fingers of Arabidopsis thaliana                                                            | 3 | Phosphate ion homeostasis                   |
| Core promoter initiator elements                                                                | 2 | Transcription initiation                    |
| ABA response elements                                                                           | 2 | abscisic acid-activated signaling pathway   |
| Auxin Response Factor 3                                                                         | 2 | Auxin metabolism, floral metabolism         |
| CCAAT binding factors                                                                           | 2 | ABA response, water stress                  |
| Ethylene response element factors                                                               | 2 | morphogenesis                               |
| Flowering bHLH factors                                                                          | 2 | Flowering, stomatal movement                |

|                                                      |   |                                                       |
|------------------------------------------------------|---|-------------------------------------------------------|
| GAP-Box (light response elements)                    | 2 | Light response                                        |
| Plant G-box/C-box bZIP proteins                      | 2 | ABA, osmotic stress, salt stress, calcium             |
| Growth regulating factor family                      | 2 | Leaf development                                      |
| Light responsive element motif                       | 2 | Hypoxia                                               |
| Conserved box A in PAL and 4CL gene promoters        | 2 | Elicitor-responsive                                   |
| Plant nitrate-responsive cis-elements                | 2 | Nitrate assimilation, water deprivation               |
| Pollen-specific regulatory elements                  | 2 | Pollen development                                    |
| B3 domain-containing REM family                      | 2 | flower development                                    |
| RWP-RK domain proteins                               | 2 | Nitrogen signaling                                    |
| Root hair-specific cis-elements in angiosperms       | 2 | Root-specific                                         |
| Upstream sequence element of U-snRNA genes           | 2 | RNA processing                                        |
| WUS homeobox-containing protein family               | 2 | Repressor in stem cell activator in floral patterning |
| General transcription factor IIIC, GTF3C             | 1 | Core element                                          |
| B-box type zinc finger-containing proteins           | 1 | Core, ubiquitous                                      |
| Dc3 promoter binding factors                         | 1 | Seed-specific, ABA responsive                         |
| E2F-homolog cell cycle regulators                    | 1 | DNA repair                                            |
| Ethylene insensitive 3 like factors                  | 1 | Ethylene, Hypoxia, Sugar                              |
| EPF-type zinc finger factors                         | 1 | Defence                                               |
| ER stress-response elements                          | 1 | ER stress                                             |
| Floral homeotic protein APETALA 2                    | 1 | Reproductive                                          |
| Myb-related DNA binding proteins (Golden2, ARR, Psr) | 1 | Floral development                                    |
| High mobility group factors                          | 1 | Transcriptional enhancer                              |
| ID domain factors                                    | 1 | Aux Biosynthesis                                      |
| Mycorrhiza transcription factor                      | 1 | Elicitor                                              |
| Nodulin consensus sequence 3                         | 1 | Nitrogen signaling                                    |
| NACL-inducible genes                                 | 1 | hyperosmotic salinity response                        |
| Paired amphipathic helix domain factors              | 1 | Chromatin modulation                                  |
| Protein secretory pathway element                    | 1 | Heat responsive                                       |
| 5'-part of bipartite RAV1 binding site               | 1 | Not characterized                                     |
| Soybean embryo factor 4                              | 1 | Seed specific                                         |
| Transposase-derived transcription factors            | 1 | Circadian Rhythm                                      |
| TEF-box                                              | 1 | Telomeric, activation                                 |
| Telo box (plant interstitial telomere motifs)        | 1 | response to salt stress, ethylene, SA                 |
| VIP1 responsive elements                             | 1 | Osmotic stress, salt stress, sulphate starvation      |
| WT-Box                                               | 1 | Circadian Rhythm                                      |

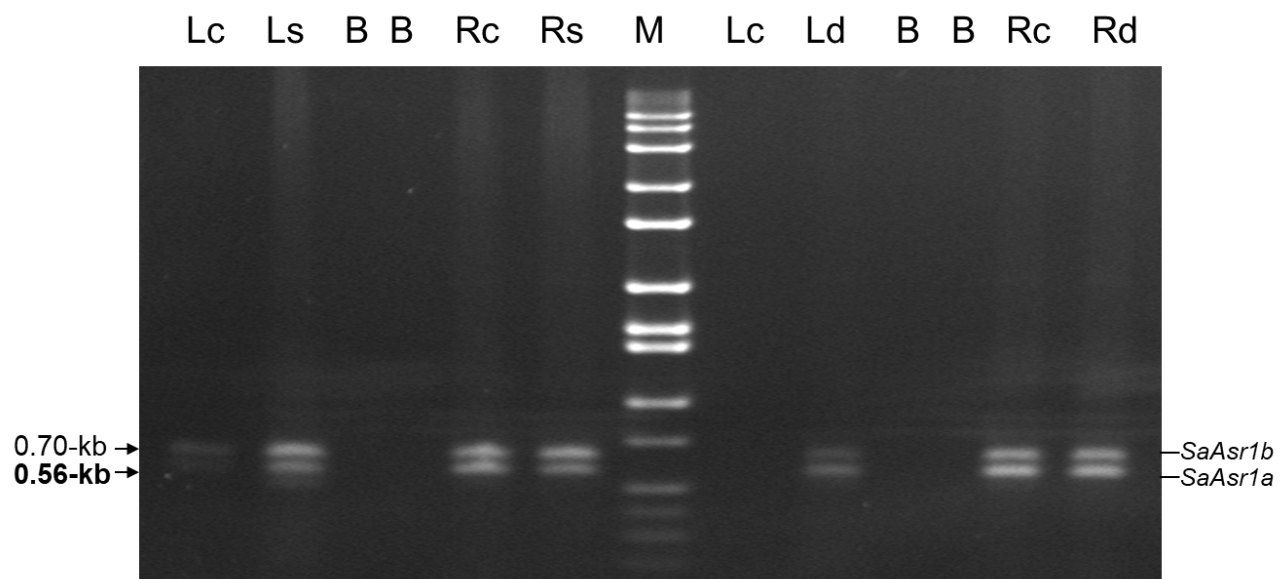

Supplementary Fig. S1

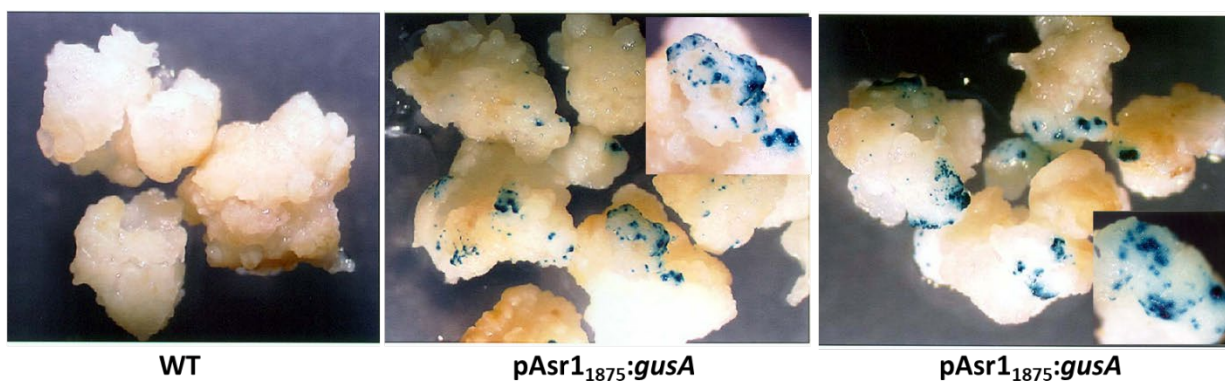

Supplementary Fig. S2
